# Supplementary material for: Caveolin 1 is Associated with Upregulated Claudin 2 in Necrotizing Enterocolitis
Source: PubMed Central journal article supplement (PMC6428816; doi:10.1038/s41598-019-41442-4), 2019-03-21
Supplement: 41598_2019_41442_MOESM1_ESM.pdf [file 41598_2019_41442_MOESM1_ESM.pdf]

## **Supplementary Information**

**Title:** Caveolin 1 is Associated with Upregulated Claudin 2 in Necrotizing Enterocolitis

**Authors:** Guillermo Ares, Christie Buonpane, John Sincavage, Carrie Yuan, Douglas R. Wood, Catherine J. Hunter

## Caco-2 Claudin Protein Expression

a.

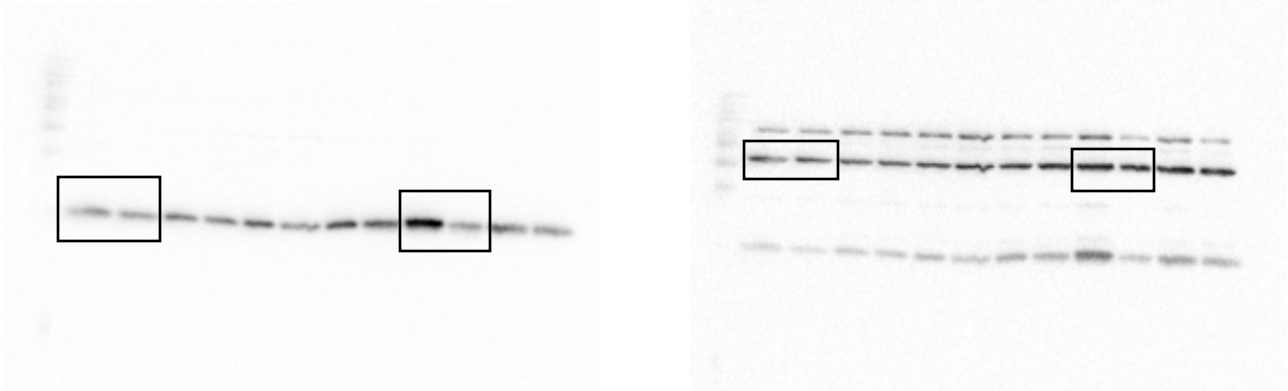

b.

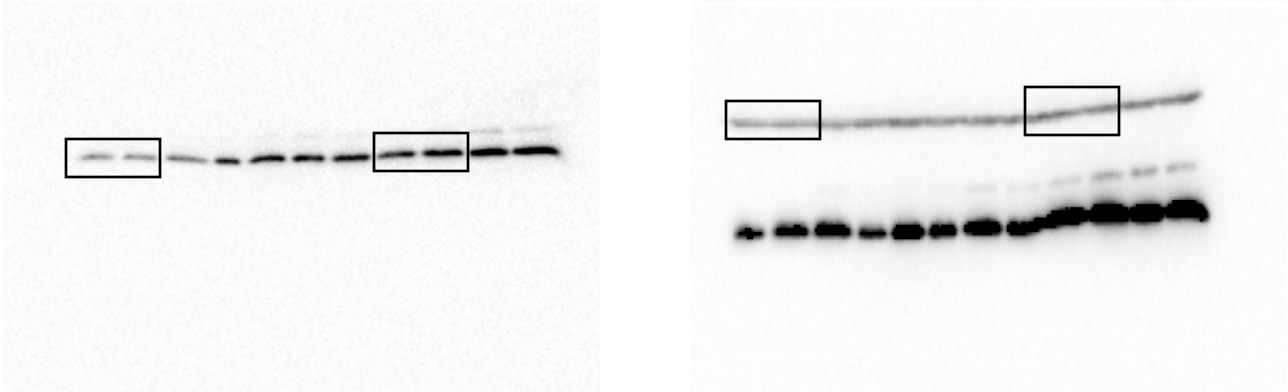

c.

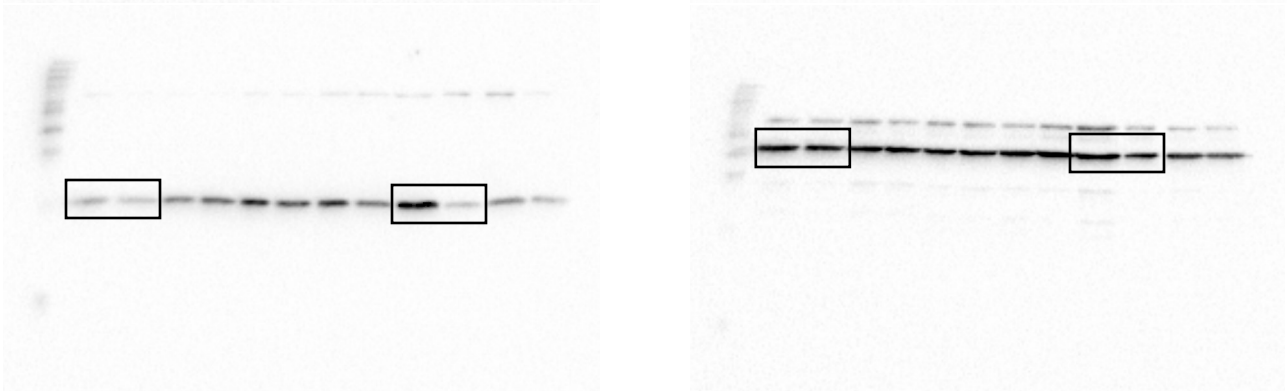

d.

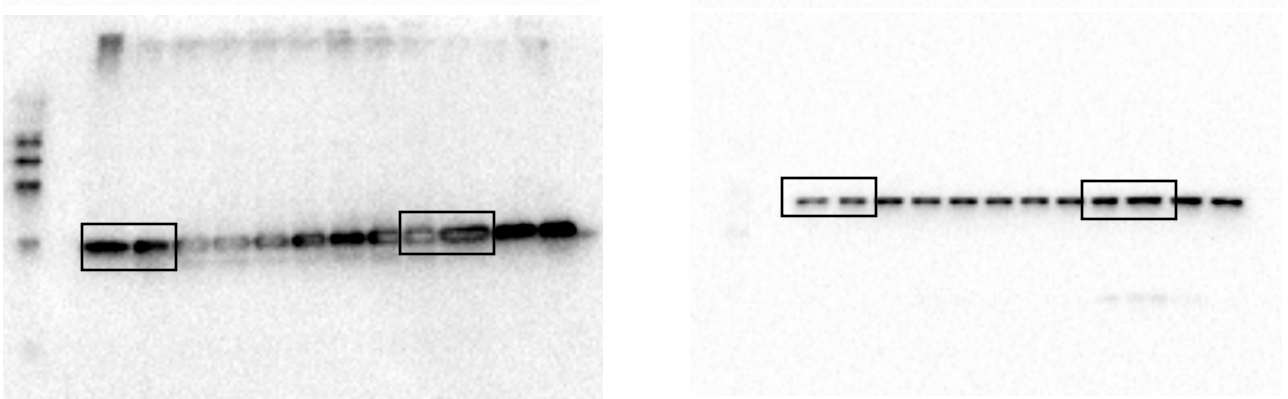

**Supplementary Figure S1:** Full length western blots used for Figure 2b. **a.** Caco-2 Claudin 1 (left) and  $\beta$ -actin (right) western blots. **b.** Caco-2 Claudin 2 (left) and  $\beta$ -actin (right) western blots. **c.** Caco-2 Claudin 3 (left) and  $\beta$ -actin (right) western blots. **d.** Caco-2 Claudin 4 (left) and  $\beta$ -actin (right) western blots.

## Rat Claudin 2 Protein Expression

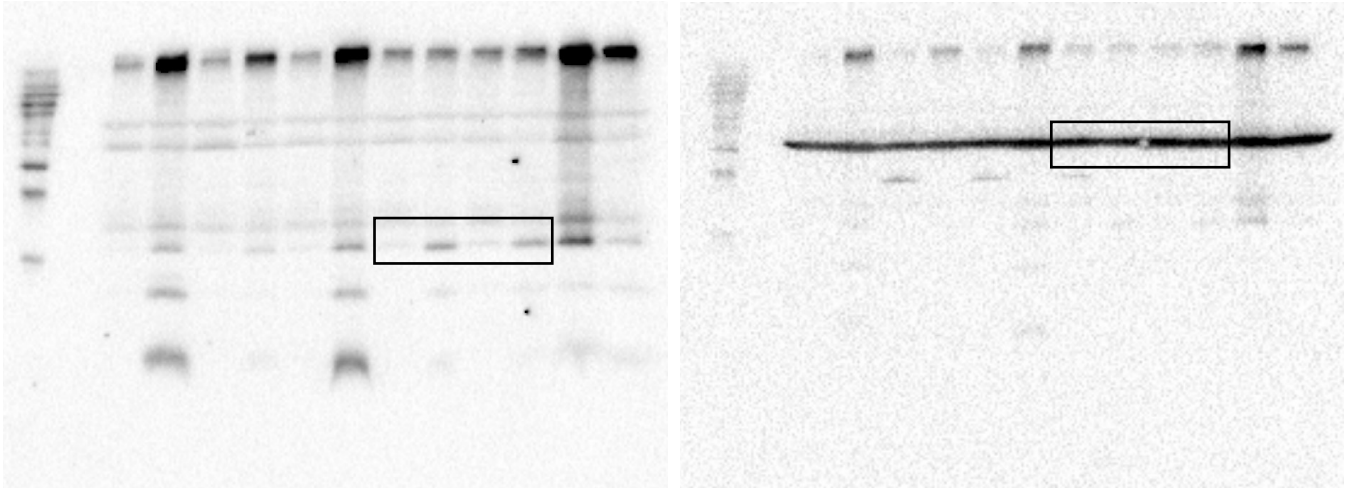

**Supplementary Figure S2:** Full length western blots used for Figure 3b. Rat Claudin 2 (left) and  $\beta$ -actin (right) western blots.

## Caco-2 Localization of Claudin 2

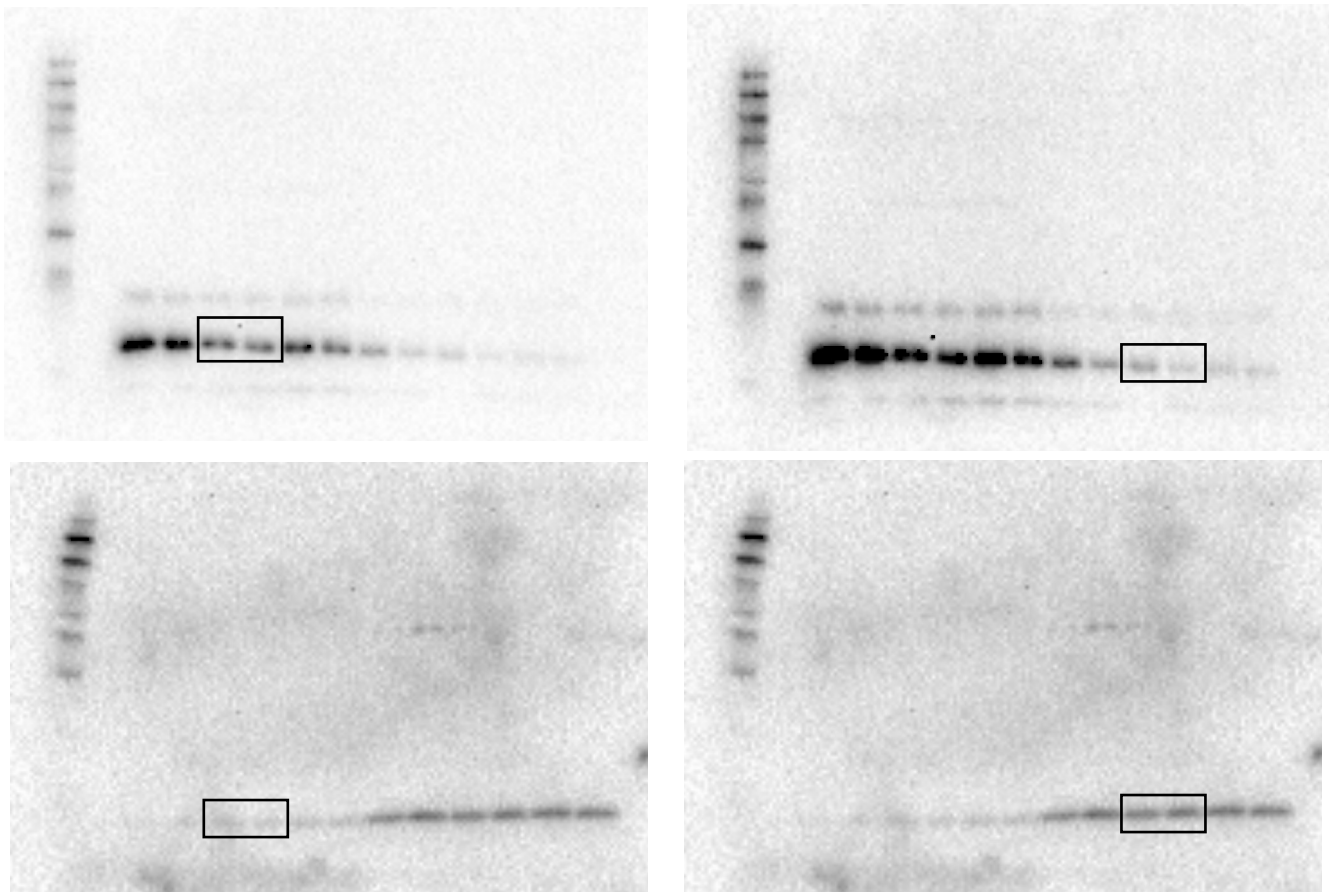

**Supplementary Figure S3:** Full length western blots used for Figure 4a. Caco-2 Cytosol (top left), Caco-2 Membrane (top right), Caco-2 Nucleus (bottom left) and Caco-2 Cytoskeleton (bottom right) western blots.

## Claudin 2 Knock-in Protein Expression

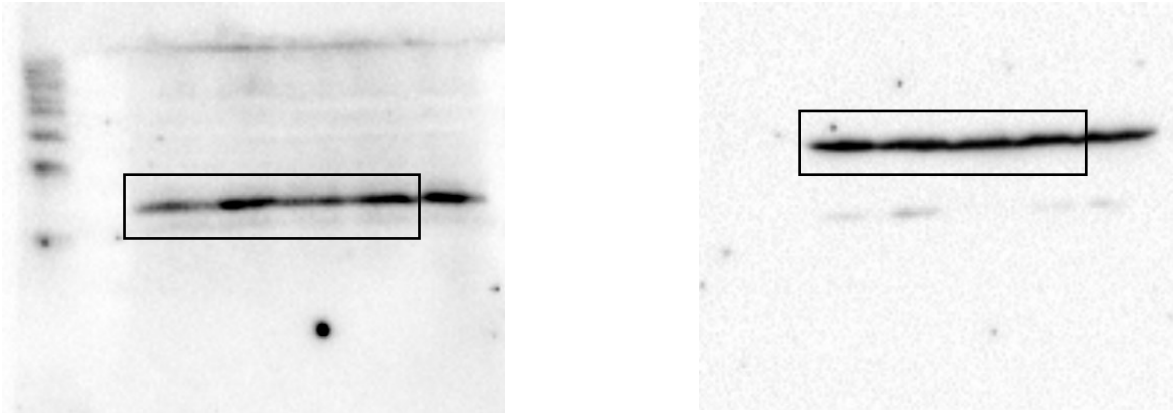

**Supplementary Figure S4:** Full length western blots used for Figure 5b. Claudin 2 (left) and  $\beta$ -actin (right) western blots.

## Immunoprecipitation

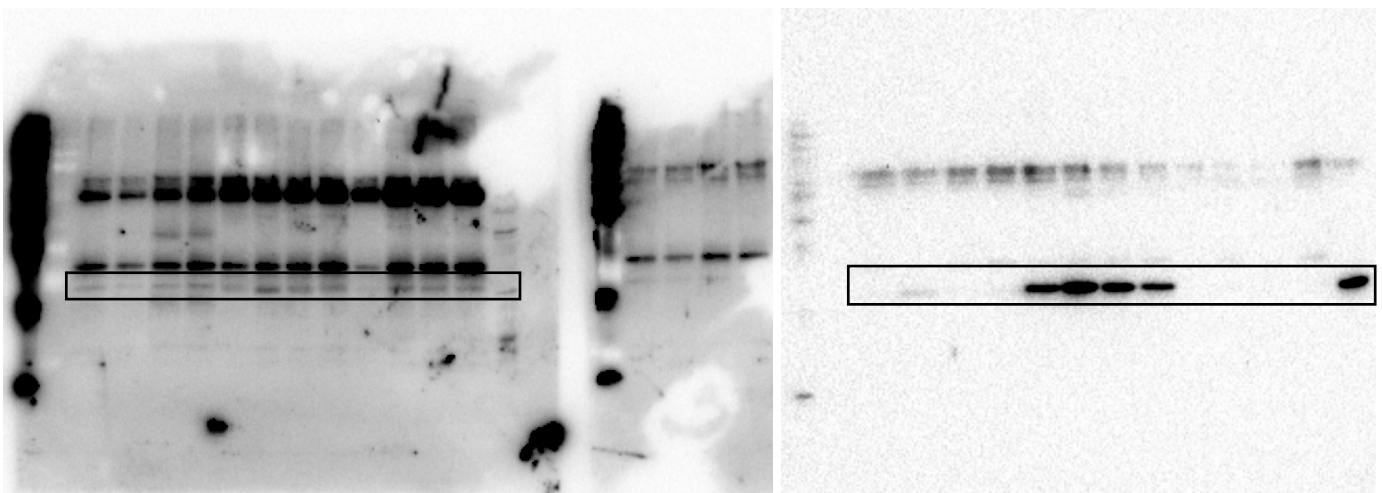

**Supplementary Figure S5:** Full length western blots used for Figure 7 a & b. Claudin 2 (left) and Caveolin 1 (right) western blots.
